# Supplementary material for: The fabrication of Ti3C2 and Ti3CN MXenes by electrochemical etching
Source: Royal Society of Chemistry journal article supplement (doi:10.1039/d4ta03457k), 2024-01-01
Supplement: d4ta03457k1.pdf [file d4ta03457k1.pdf]

## The fabrication of $\text{Ti}_3\text{C}_2$ and $\text{Ti}_3\text{CN}$ MXenes by electrochemical etching

### Supporting information

Bragg's law and the reciprocal-space metric tensor equation of hexagonal crystal lattices:

$$n\lambda = 2d\sin(\theta); \quad \frac{1}{d^2} = \frac{4}{3} \left( \frac{h^2 + hk + k^2}{a^2} \right) + \frac{l^2}{c^2}$$

### Calculation of charge conducted during the electrochemical etching

$$\text{Number of electron conducted during etching} = \sum_{t=24\text{ h}}^{e^-} It. \quad 6.24 \times 10^{18} \text{C}^{-1}$$

$$\text{Number of MAX phases unit cell} = \frac{m_{\text{MAX}}}{M_w(\text{MAX})} N_A$$

$I$  = current;  $t$  = etching time;  $m_{\text{MAX}}$  = mass of MAX phases;  $M_w(\text{MAX})$  = molecular weight of MAX phases;

$N_A$  = Avogadro constant

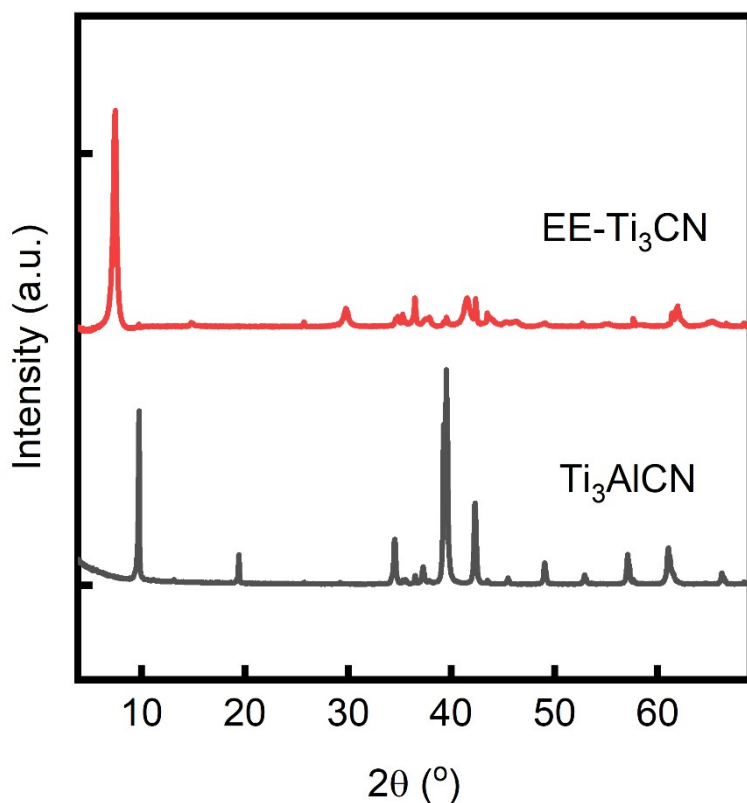

Figure S1. XRD spectrum of  $\text{Ti}_3\text{AlCN}$  precursor and electrochemically etched  $\text{Ti}_3\text{CN}$ . (Etching condition:

+1 V, 35 °C, 28 h.)

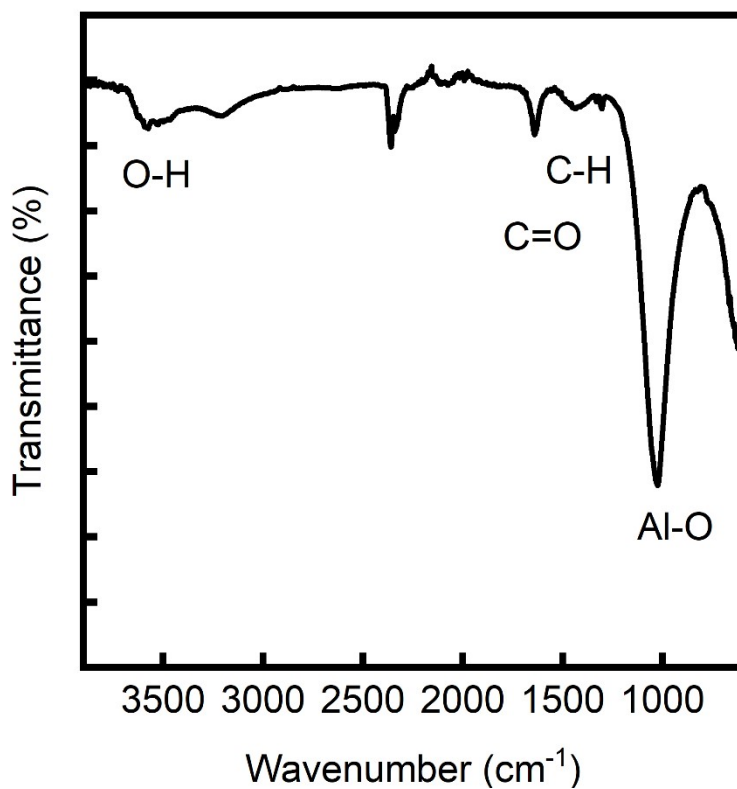

Figure S2. Infrared spectrum of the aluminium oxide precipitate after all  $\text{HBF}_4$  electrolyte residue was evaporated.

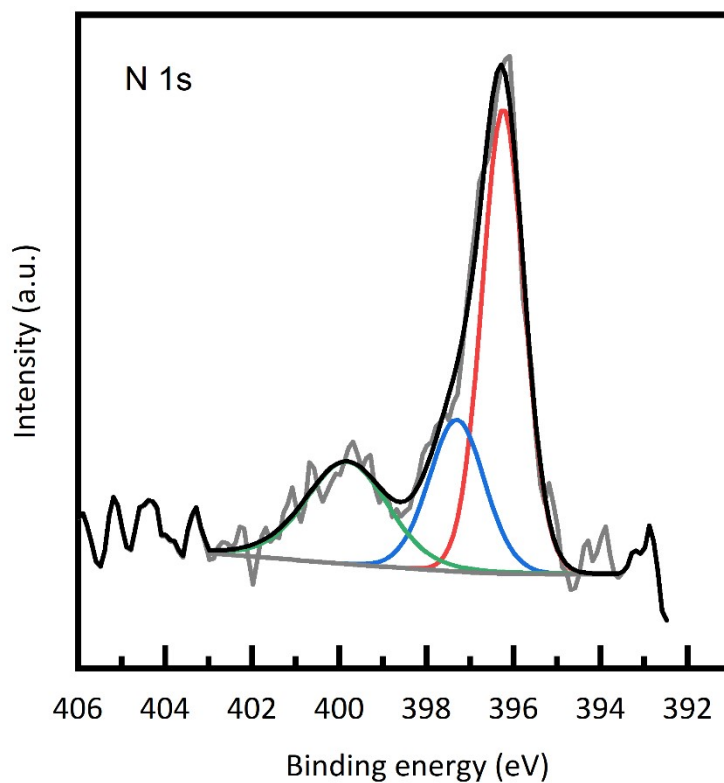

Figure S3. XPS N 1s spectrum of  $\text{EE-Ti}_3\text{CN}$ . Peaks located at 396.4, 397.1, 399.5, and 402.4 eV

are assigned for N-Ti, N-C, CH<sub>3</sub>CN, and NH<sub>4</sub>NO<sub>3</sub>

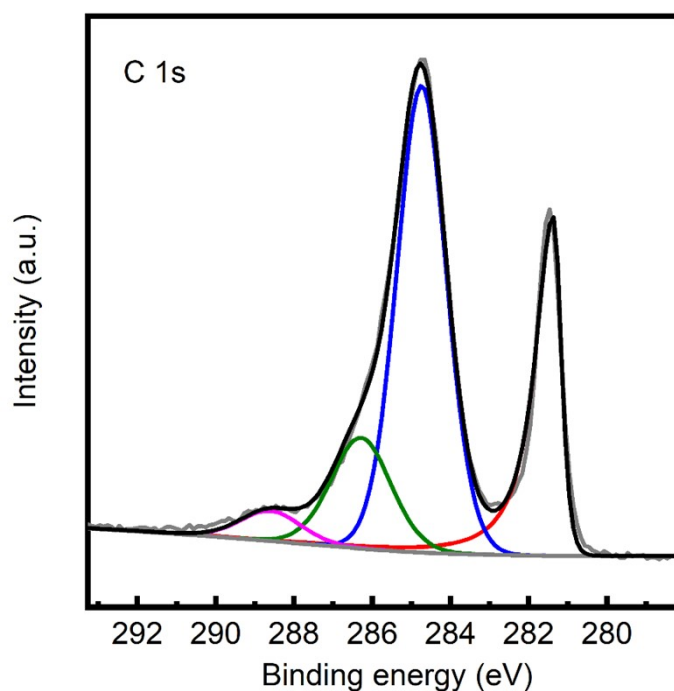

Figure S4. XPS C 1s spectrum of EE-Ti<sub>3</sub>CN. peak located at 281.5, 284.7, 286.4, and 288.6 eV are assigned for X-Ti, C-C, C-O, and C=O, respectively.

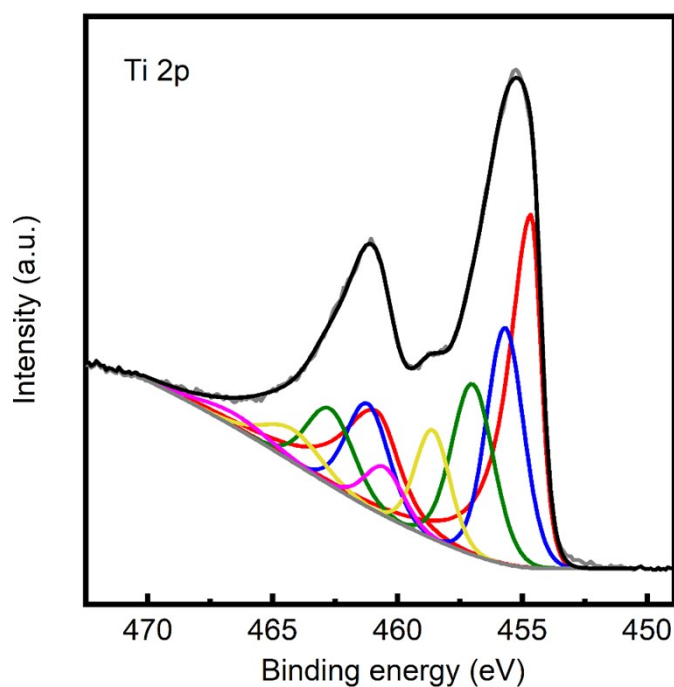

Figure S5. XPS Ti 2p spectrum of EE-Ti<sub>3</sub>CN. Peaks located at 455.0(461.2), 455.9 (461.4), 457(462.7), 458.6(464.2), 460.2(466.2) eV are assigned for titanium metal in

the oxidation state of +1 to +3,  $TiO_2$ , and  $X-Ti-F$ , respectively.

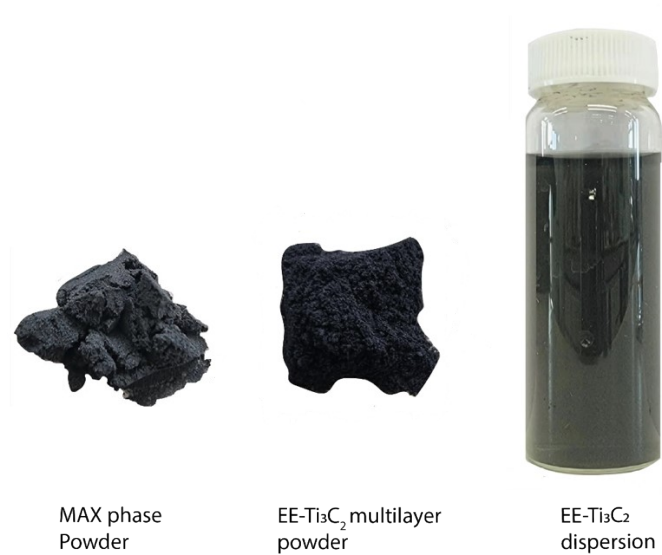

Figure S6. Photographs of  $Ti_3AlC_2$  precursor,  $EE-Ti_3C_2$  multilayer powder, dispersion of TMAOH treated  $EE-Ti_3C_2$  in water.

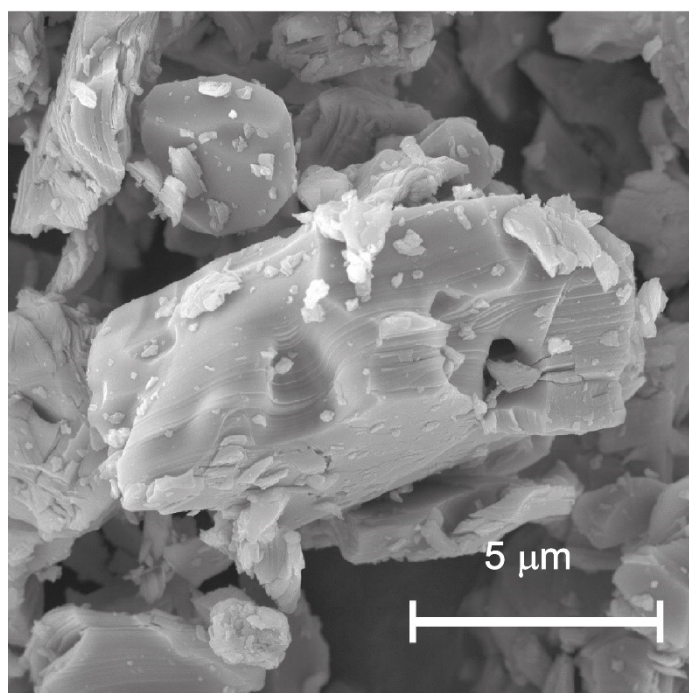

Figure S7. SEM images for  $Ti_3AlC_2$  MAX phase.

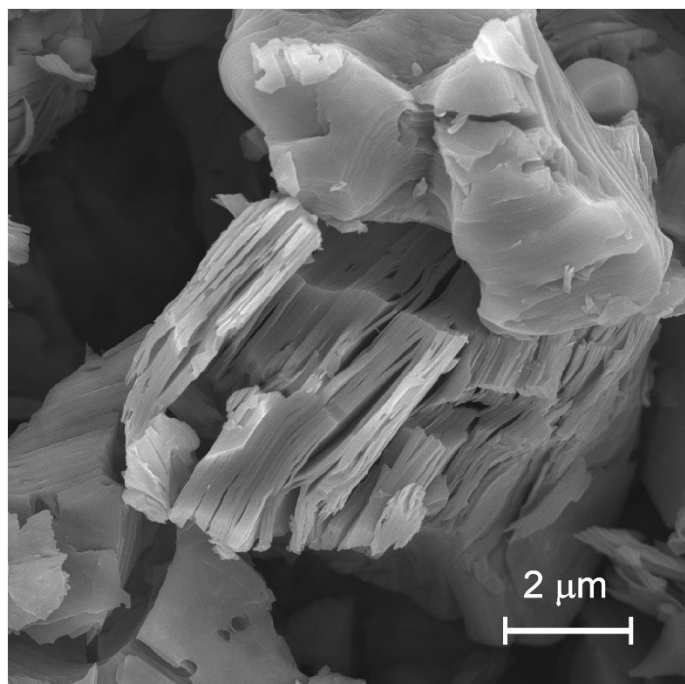

Figure S8. SEM image for EE-Ti<sub>3</sub>CN.

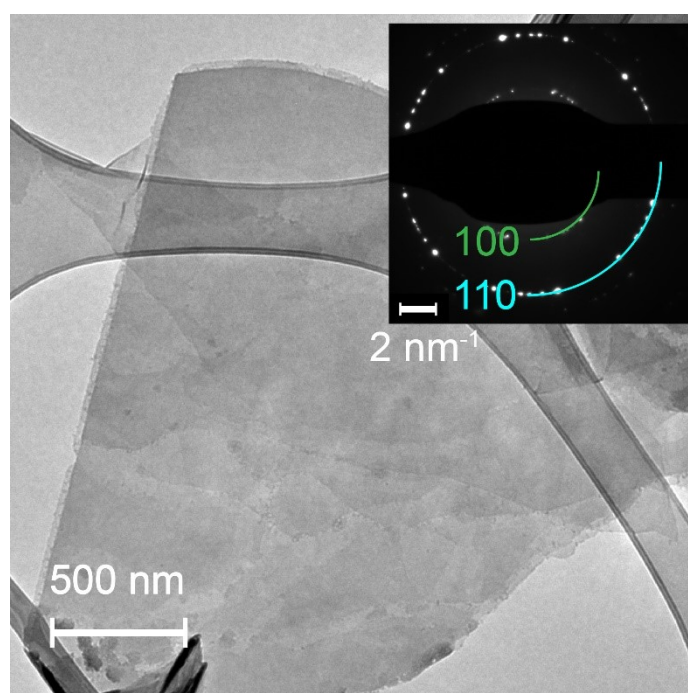

Figure S9. TEM image for EE-Ti<sub>3</sub>CN delaminated flakes. (110) diffraction= 1.51 Å. (100) diffraction= 2.58 Å.
